# Supplementary material for: Intramolecular hydrogen-atom tunneling in matrix-isolated heterocyclic compounds: 2-thiouracil and its analogues
Source: Royal Society of Chemistry journal article supplement (doi:10.1039/d4cp02799j), 2024-01-01
Supplement: d4cp02799j1.pdf [file d4cp02799j1.pdf]

## Intramolecular Hydrogen-Atom Tunneling in Matrix-Isolated Heterocyclic Compounds: 2-Thiouracil and Its Analogues

Hanna Rostkowska, Leszek Lapinski and Maciej J. Nowak

### Supporting Information

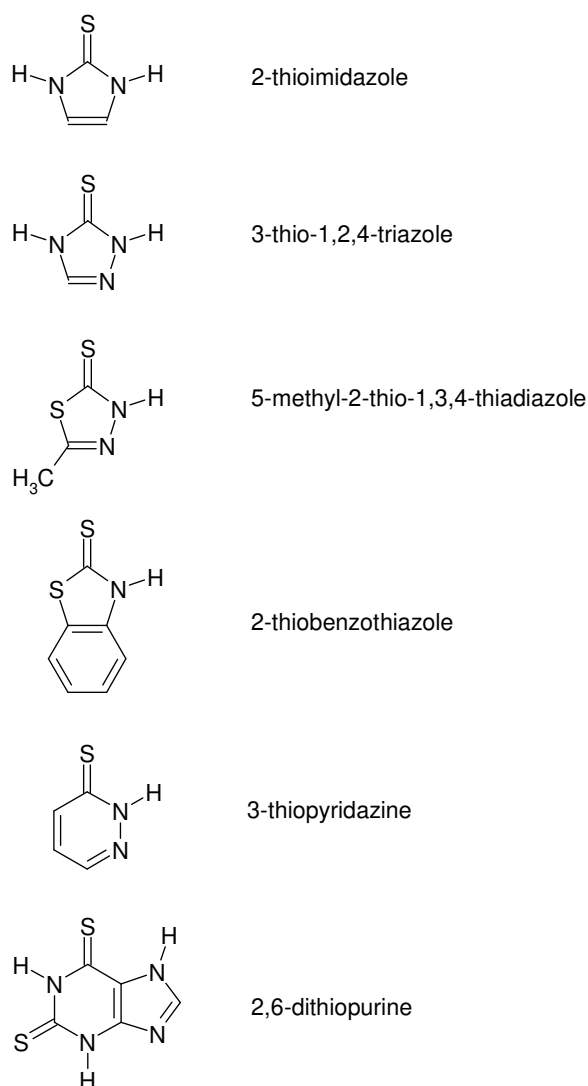

**Scheme S1.** Structures of heterocyclic compounds with five- and six-membered heterocyclic rings for which no spontaneous thiol  $\rightarrow$  thione tautomerization was observed.

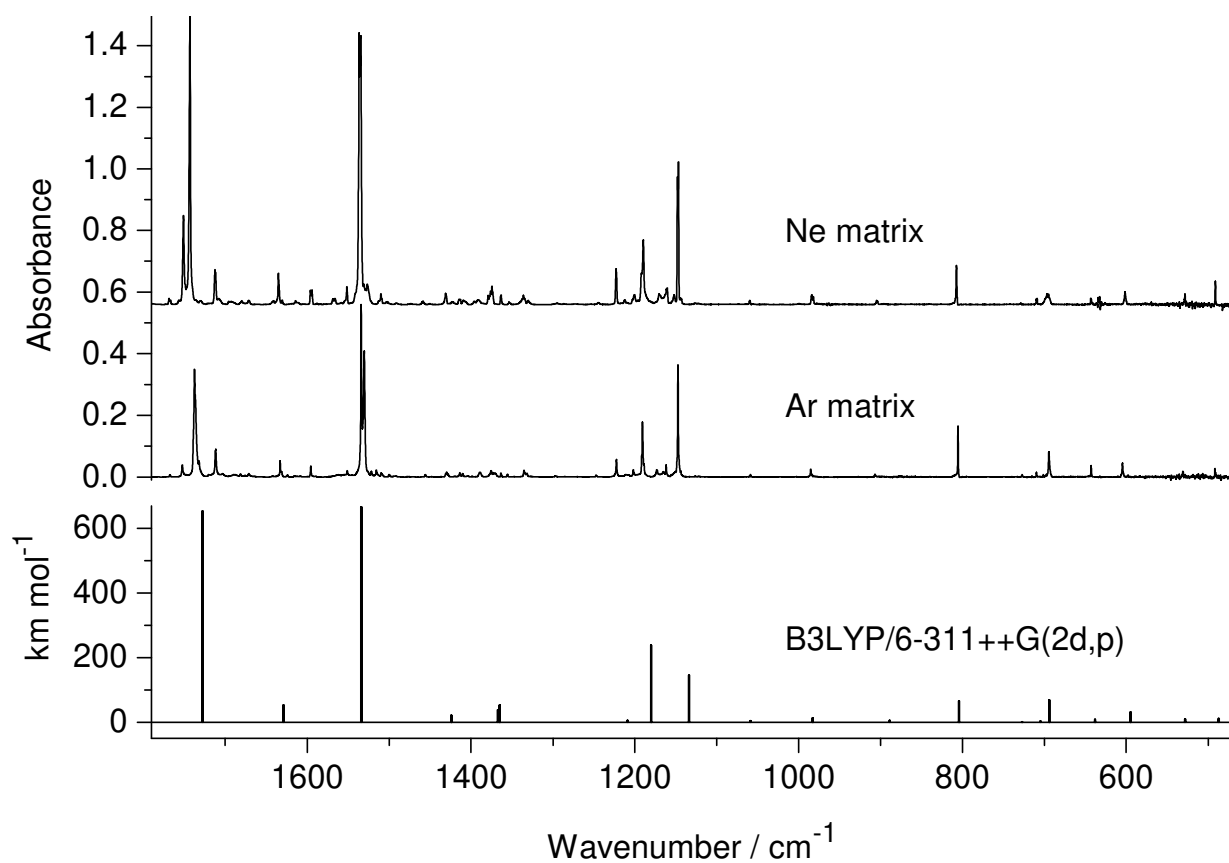

**Figure S1.** Infrared spectra of 2-thiouracil monomers isolated in Ar and Ne matrices compared with the theoretical spectrum calculated at the B3LYP/6-311++G(2d,p) level for the most stable oxo-thione tautomer **I**.

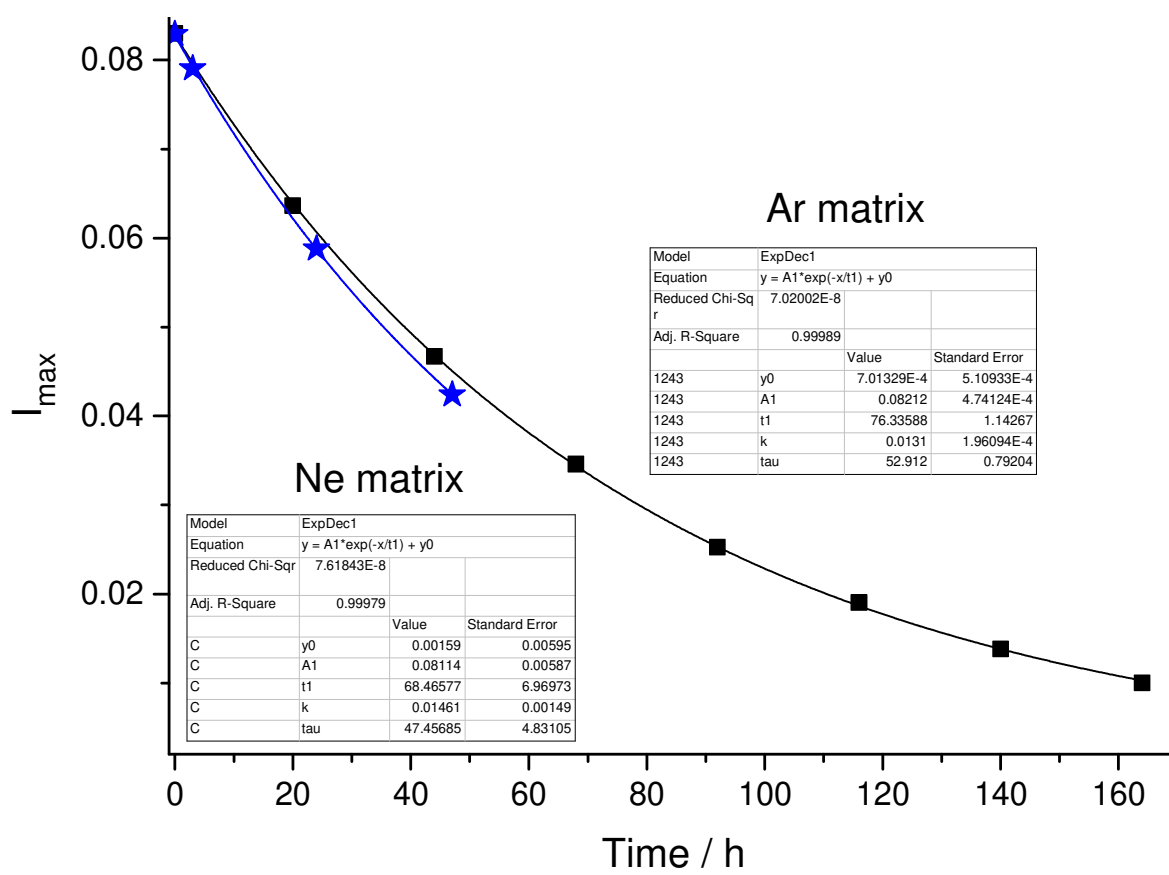

**Figure S2.** Progress of the spontaneous thiol  $\rightarrow$  thione hydrogen-atom tunneling observed for 2-thiouracil monomers isolated in Ar and Ne matrices kept at 3.5 K and in the dark. The progress of the conversion was measured as an intensity decrease of the bands due to form **III** observed at 1243  $\text{cm}^{-1}$  (Ar matrix) and 1646  $\text{cm}^{-1}$  (Ne matrix).

Table S1.

The spectral positions ( $\tilde{\nu}$ ) and relative intensities ( $I$ ) of the detected IR absorption bands attributed to the oxo-thiol form **III** of 2-thiouracil. The bands are assigned to the normal modes that are theoretically predicted at the DFT(B3LYP)/6-311++G(2d,p) level for form **III**.

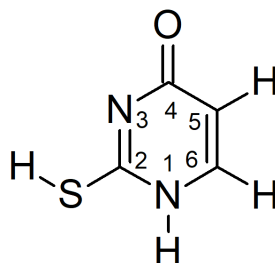

| Ar matrix                         |                    | Calculated at DFT(B3LYP)/6-311++G(2d,p) level |                                               |          |                                                    |
|-----------------------------------|--------------------|-----------------------------------------------|-----------------------------------------------|----------|----------------------------------------------------|
| $\tilde{\nu}$<br>cm <sup>-1</sup> | $I$<br><i>rel.</i> | $\tilde{\nu}^a$<br>cm <sup>-1</sup>           | $A^{th}$<br>km <sup>2</sup> mol <sup>-1</sup> | Symmetry | Approximate description <sup>b</sup>               |
| 3467                              | 125                | 3484                                          | 83                                            | A'       | $\nu$ N1H                                          |
| 2616, <u>2614</u>                 | 22                 | 2586                                          | 11                                            | A'       | $\nu$ S-H                                          |
| 1707sh, <u>1701</u>               | 252                | 1703                                          | 455                                           | A'       | $\nu$ C=O, $\beta$ ring                            |
| 1643                              | 71                 | 1645                                          | 141                                           | A'       | $\beta$ C6H, $\beta$ N1H, $\beta$ C5H, $\nu$ C5=C6 |
| 1562, <u>1557</u>                 | 303                | 1562                                          | 456                                           | A'       | $\beta$ N1H, $\nu$ C2=N3                           |
| 1478, <u>1476</u> , 1471          | 122                | 1464                                          | 165                                           | A'       | $\beta$ N1H, $\nu$ C2-N1, $\nu$ N1-C6              |
| 1259, <u>1252</u> , 1244          | 175                | 1237                                          | 242                                           | A'       | $\beta$ N1H, $\beta$ C6H, $\nu$ C4-N3, $\nu$ C4-C5 |
| 1028                              | 7                  | 1053                                          | 4                                             | A'       | $\beta$ N1H, $\beta$ C5H, $\beta$ C=S              |
| 988                               | 30                 | 988                                           | 37                                            | A'       | $\beta$ C=S, $\beta$ ring                          |
| 899                               | 29                 | 886                                           | 26                                            | A'       | $\beta$ C=S, ring breath                           |
| 846                               | 4                  | 842                                           | 6                                             | A'       | $\beta$ C=S, $\beta$ ring                          |
| 827                               | 30                 | 824                                           | 49                                            | A''      | $\gamma$ C5H, $\gamma$ C6H, ring torsion           |
| 694                               | 8                  | 686                                           | 8                                             | A'       | $\beta$ ring, $\nu$ C-S                            |
| 508                               | 30                 | 468                                           | 39                                            | A''      | $\gamma$ N1H, $\gamma$ C6H                         |

The most intense components of the split bands are underlined.

<sup>a</sup> Theoretically predicted wavenumbers were scaled by 0.98 for wavenumbers lower than 2000 cm<sup>-1</sup>, or by 0.95 for wavenumbers higher than 2000 cm<sup>-1</sup>.

<sup>b</sup> Abbreviations:  $\nu$  stretching;  $\beta$  bending in-plane;  $\gamma$  bending out-of-plane.

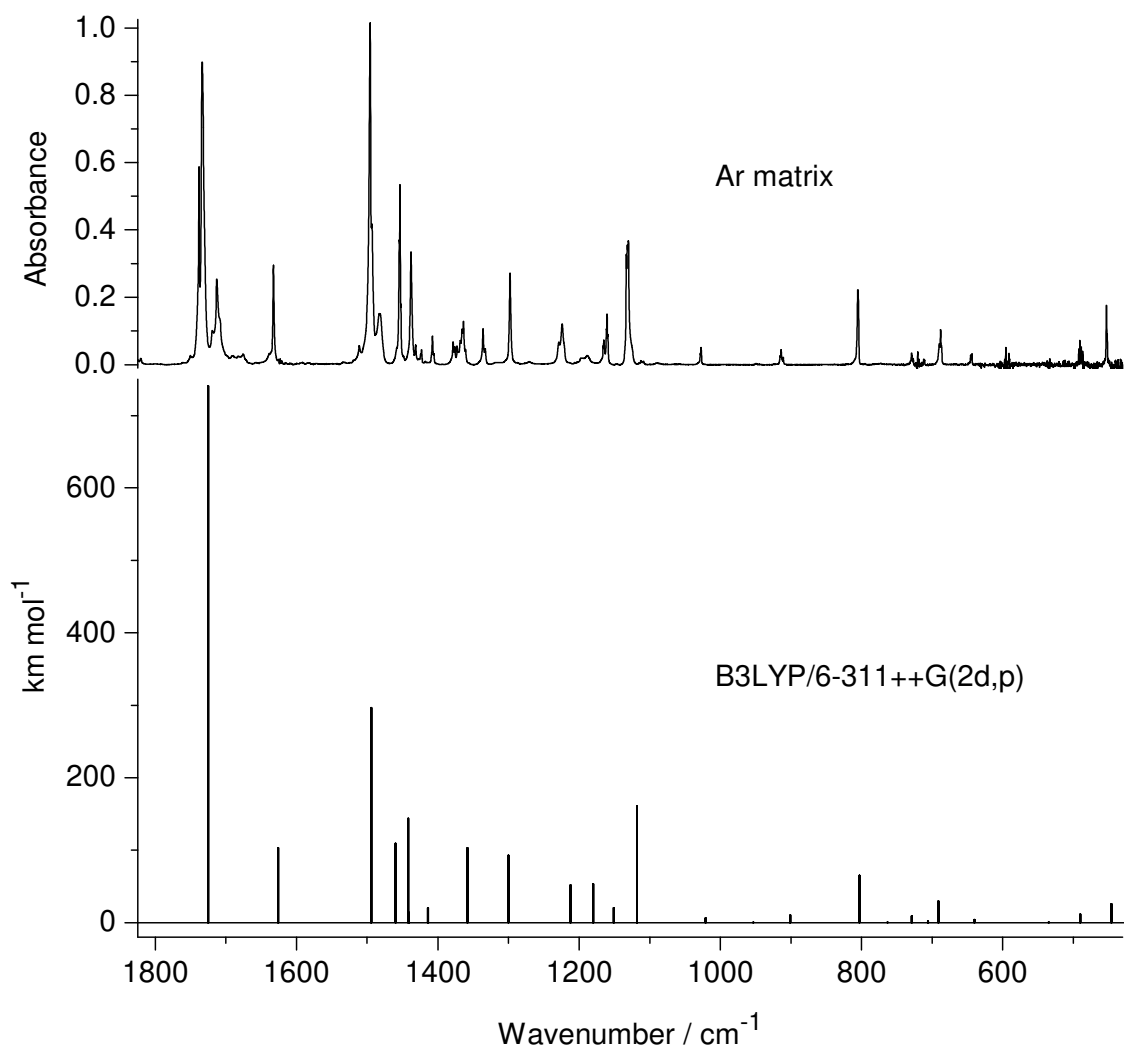

**Figure S3.** Infrared spectrum of 1-methyl-2-thiouracil monomers isolated in an Ar matrix compared with the theoretical spectrum calculated at the B3LYP/6-311++G(2d,p) level for the most stable oxo-thione tautomer **V**.

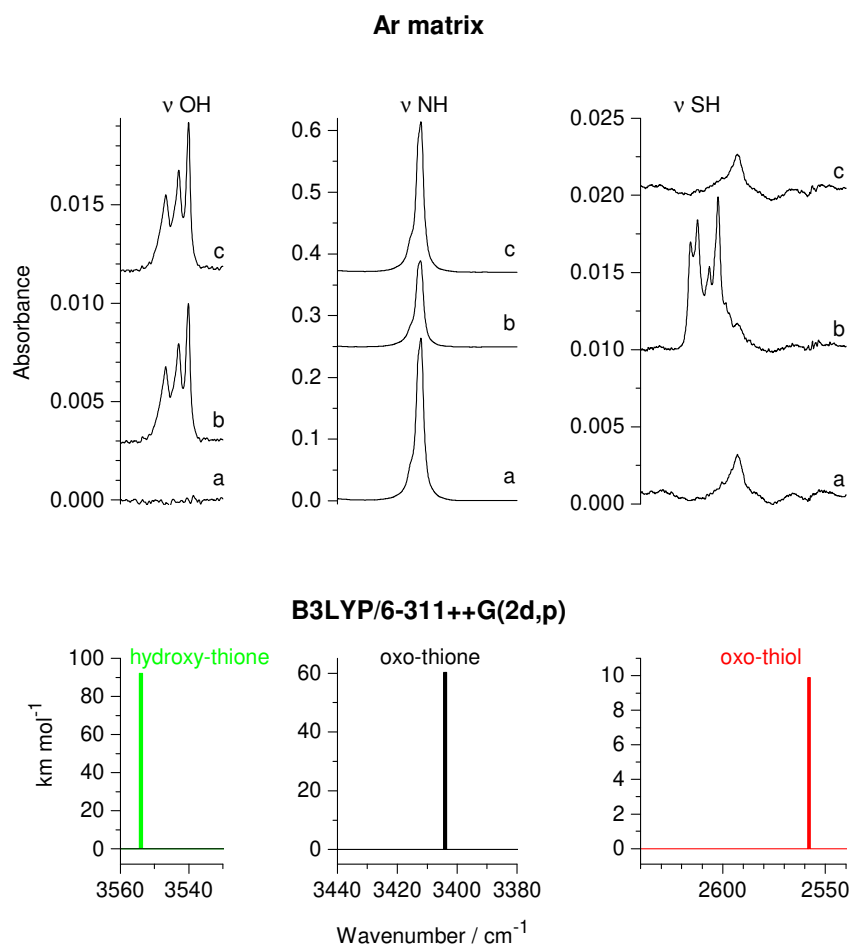

**Figure S4.** High-frequency fragment of the infrared spectra of 1-methyl-2-thiouracil monomers isolated in a low-temperature Ar matrix: (a) after deposition of the matrix; (b) after 5 hours of exposure to UV( $\lambda=305$  nm) light; (c) after subsequent 16 hours when the matrix was kept at 3.5 K and in the dark; compared with the theoretical spectra simulated at the B3LYP/6-311++G(2d,p) level for: (black) the oxo-thione form **V**; (red) the oxo-thiol form **VI**; (green) the hydroxy-thiol form **VII** of the compound.

**Table S2.**

The spectral positions ( $\tilde{\nu}$ ) and relative intensities ( $I$ ) of the detected IR absorption bands attributed to the oxo-thiol form **VI** of 1-methyl-2-thiouracil. The bands are assigned to the normal modes that are theoretically predicted at the DFT(B3LYP)/6-311++G(2d,p) level for form **VI**.

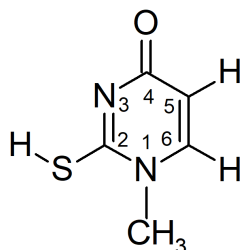

| Ar matrix                         |                    | Calculated at DFT(B3LYP)/6-311++G(2d,p) level |                                               |          |                                                           |
|-----------------------------------|--------------------|-----------------------------------------------|-----------------------------------------------|----------|-----------------------------------------------------------|
| $\tilde{\nu}$<br>cm <sup>-1</sup> | $I$<br><i>rel.</i> | $\tilde{\nu}^a$<br>cm <sup>-1</sup>           | $A^{th}$<br>km <sup>2</sup> mol <sup>-1</sup> | Symmetry | Approximate description <sup>b</sup>                      |
| 2961                              | 10                 | 2946                                          | 7                                             | A''      | vCH <sub>3</sub>                                          |
| 2938                              |                    | 2890                                          | 23                                            | A'       | vCH <sub>3</sub> sym                                      |
| 2614, 2603                        | 20                 | 2558                                          | 10                                            | A'       | vS-H                                                      |
| 1690                              | 350                | 1696                                          | 548                                           | A'       | vC=O, $\beta$ C5H, $\beta$ ring                           |
| 1641                              | 150                | 1642                                          | 223                                           | A'       | $\beta$ C6H, $\beta$ C5H, vring                           |
| <u>1510</u> , 1506                | 240                | 1510                                          | 315                                           | A'       | $\beta$ CH <sub>3</sub> , $\beta$ C5H, $\beta$ C6H, vring |
| 1478                              | 80                 | 1485                                          | 69                                            | A'       | $\beta$ CH <sub>3</sub>                                   |
| 1423                              | 110                | 1413                                          | 101                                           | A'       | $\beta$ C5H, $\beta$ C6H, vring                           |
| 1364                              | 75                 | 1353                                          | 154                                           | A'       | $\beta$ C5H, $\beta$ C6H, $\beta$ CH <sub>3</sub> , vring |
| 1260                              | 20                 | 1243                                          | 46                                            | A'       | vC-CH <sub>3</sub> , vring, $\beta$ C6H                   |
| 1196                              | 20                 | 1189                                          | 37                                            | A'       | $\beta$ C5H, vC-CH <sub>3</sub> , $\beta$ ring            |
| 1157                              | 20                 | 1143                                          | 45                                            | A'       | $\beta$ CH <sub>3</sub> , $\beta$ C6H, vring              |
| 1112                              | 70                 | 1098                                          | 85                                            | A'       | vC-S, $\beta$ S-H, $\beta$ C5H, vring                     |
| 927                               | 15                 | 927                                           | 40                                            | A'       | $\beta$ S-H                                               |
| 825                               | 35                 | 823                                           | 50                                            | A''      | $\gamma$ C5H, $\gamma$ C6H, $\gamma$ ring                 |
| 697                               | 4                  | 690                                           | 5                                             | A'       | $\beta$ ring, vC-S                                        |

The most intense components of the split bands are underlined.

<sup>a</sup> Theoretically predicted wavenumbers were scaled by 0.98 for wavenumbers lower than 2000 cm<sup>-1</sup>, or by 0.95 for wavenumbers higher than 2000 cm<sup>-1</sup>.

<sup>b</sup> Abbreviations: v stretching;  $\beta$  bending in-plane;  $\gamma$  bending out-of-plane.

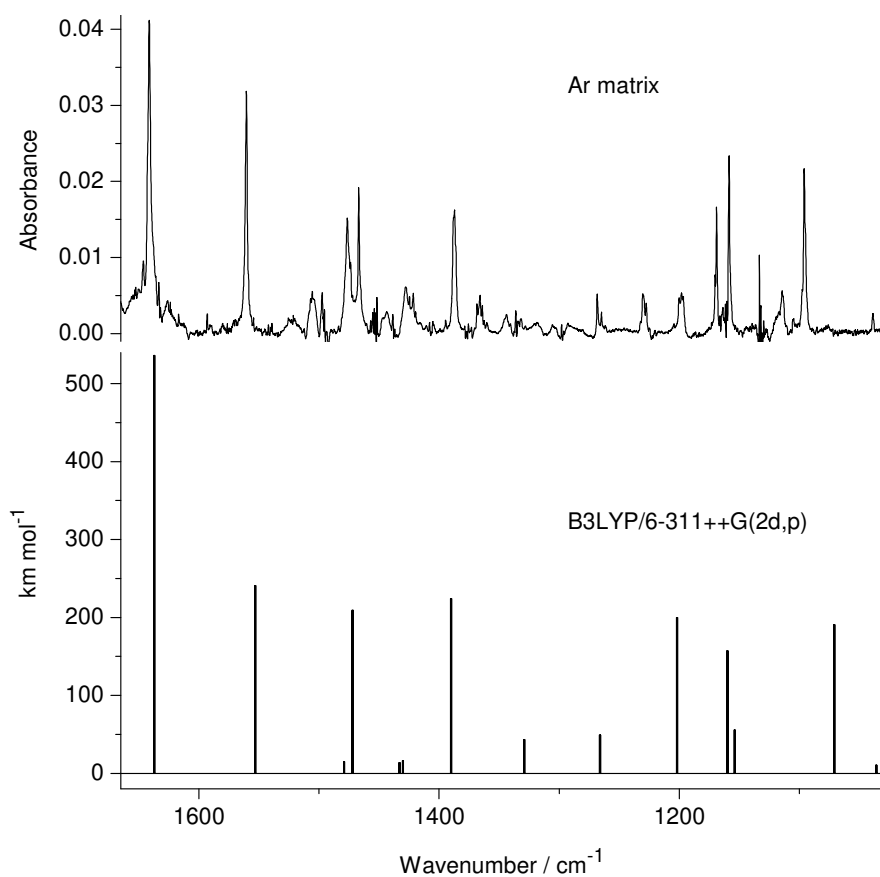

**Figure S5.** Extracted experimental spectrum of hydroxy-thione form of 1-methyl-2-thiouracil isolated in a low-temperature Ar matrix. The low-intensity bands belonging to this spectrum appeared upon UV( $\lambda=305$  nm) irradiation of matrix-isolated 1-methyl-2-thiouracil; these bands did not decrease during the period when the matrix was kept at 3.5 K and in the dark. The theoretical spectrum simulated at the B3LYP/6-311++G(2d,p) level for the hydroxy-thione form **VII** matches well the experimental spectrum.



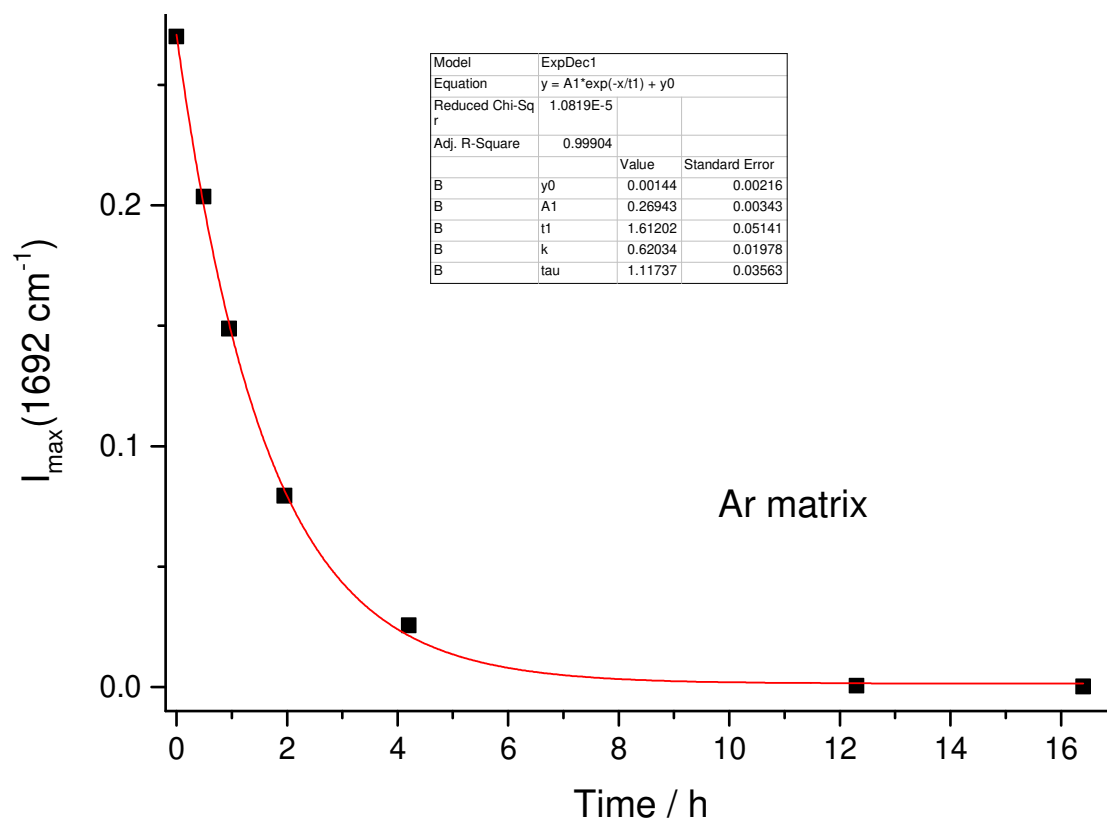

**Figure S6.** Progress of the spontaneous thiol  $\rightarrow$  thione hydrogen-atom tunneling observed for 1-methyl-2-thiouracil monomers isolated in an Ar matrix kept at 3.5 K and in the dark. The progress of the conversion was measured as an intensity decrease of the band due to form **VI** observed at  $1692 \text{ cm}^{-1}$ .

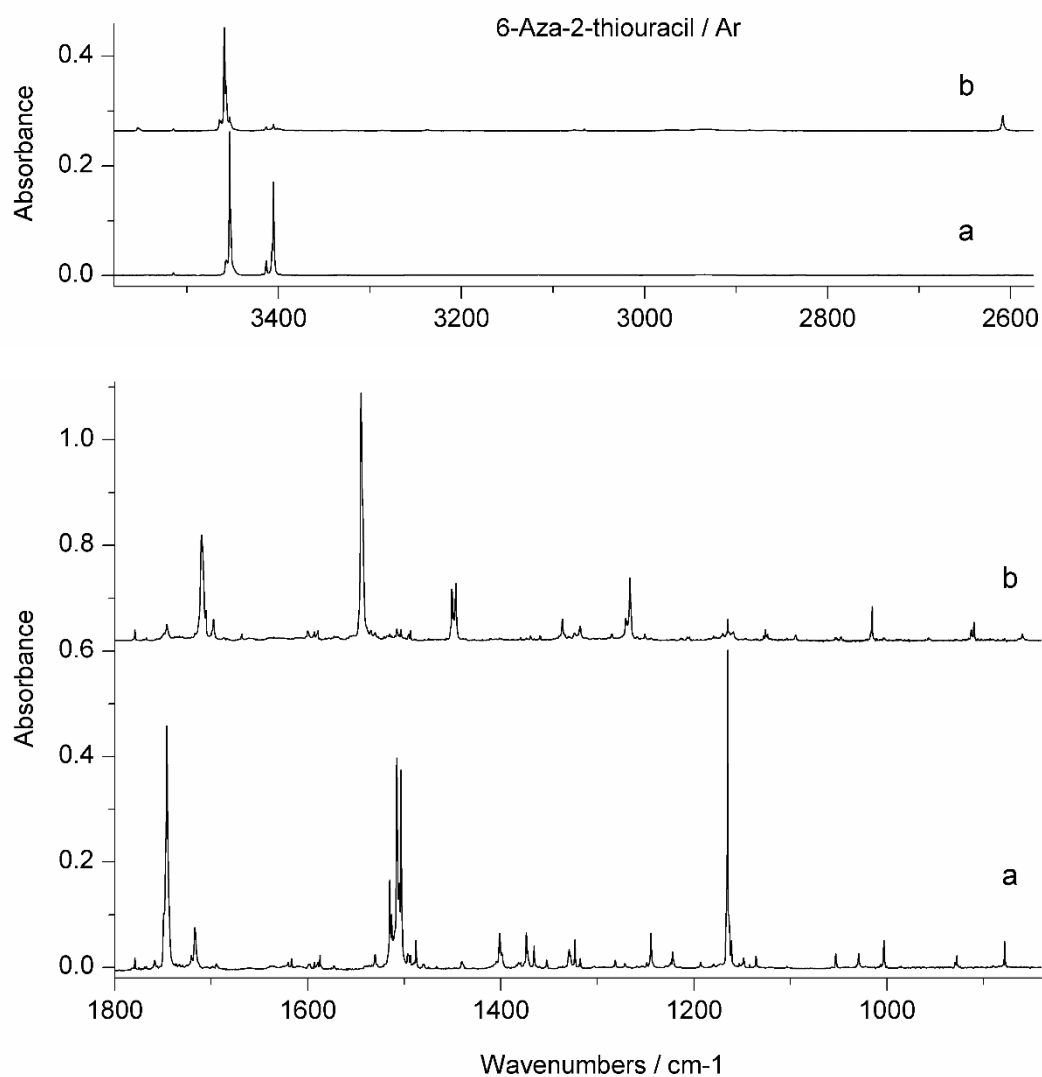

**Figure S7.** The effect of UV ( $\lambda=305$  nm) irradiation of the Ar matrix doped with monomeric molecules of 6-aza-2-thiouracil: (a) the IR spectrum recorded after matrix formation; (b) the spectrum recorded after subsequent UV irradiation of the matrix for 6 h.

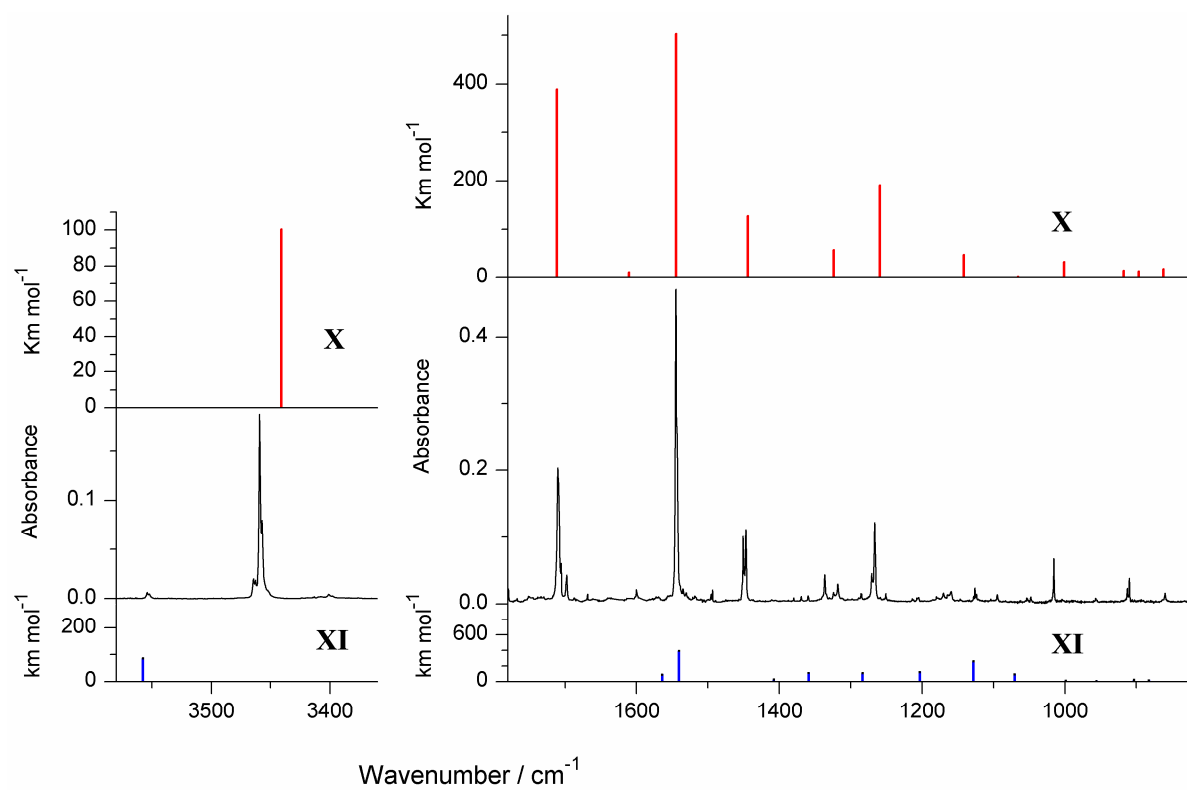

**Figure S8.** The spectrum of photoproducts generated upon 6h of UV( $\lambda=305$  nm) irradiation of the 6-aza-2-thiouracil monomers isolated in an Ar matrix compared with the theoretical spectra calculated for the oxo-thiol form **X** (red sticks) and for the hydroxy-thiol form **XI** (blue sticks).

Table S3.

The spectral positions ( $\tilde{\nu}$ ) and relative intensities ( $I$ ) of the detected IR absorption bands attributed to the oxo-thiol form **X** of 6-aza2-thiouracil. The bands are assigned to the normal modes that are theoretically predicted at the DFT(B3LYP)/6-311++G(2d,p) level for form **X**.

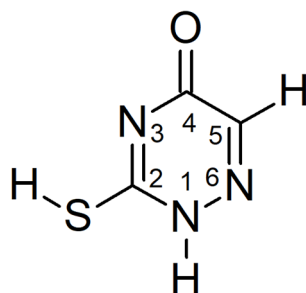

| Ar matrix                         |                    | Calculated at DFT(B3LYP)/6-311++G(2d,p) level |                                  |          |                                      |
|-----------------------------------|--------------------|-----------------------------------------------|----------------------------------|----------|--------------------------------------|
| $\tilde{\nu}$<br>cm <sup>-1</sup> | $I$<br><i>rel.</i> | $\tilde{\nu}^a$<br>cm <sup>-1</sup>           | $A^{th}$<br>km mol <sup>-1</sup> | Symmetry | Approximate description <sup>b</sup> |
| 3463, <u>3459</u> , 3457          | 200                | 3441                                          | 101                              | A'       | $\nu$ N1H                            |
| 2609                              | 30                 | 2555                                          | 12                               | A'       | $\nu$ S-H                            |
| <u>1710</u> , 1698                | 390                | 1712                                          | 389                              | A'       | $\nu$ C=O, $\beta$ ring, $\beta$ C5H |
| 1545                              | 610                | 1545                                          | 503                              | A'       | $\beta$ N1H, $\nu$ C2C3              |
| 1451, 1447                        | 170                | 1444                                          | 127                              | A'       | $\beta$ N1H, $\beta$ ring            |
| <u>1336</u> , 1318                | 90                 | 1324                                          | 58                               | A'       | $\beta$ C5H, $\beta$ N1H             |
| 1270, 1266                        | 145                | 1259                                          | 192                              | A'       | $\beta$ C5H, $\beta$ N1H, $\nu$ ring |
| 1015                              | 35                 | 1001                                          | 33                               | A'       | $\beta$ ring                         |
| 913, 910                          | 30                 | 918                                           | 15                               | A''      | $\gamma$ C5H                         |
| 860                               | 15                 | 862                                           | 18                               | A'       | $\beta$ SH, $\nu$ ring               |
| 685                               | 10                 | 680                                           | 9                                | A'       | $\beta$ ring                         |
| 567                               | 15                 | 563                                           | 11                               | A'       | $\beta$ ring                         |
| 538                               | 100                | 520                                           | 79                               | A''      | $\gamma$ N1H                         |

The most intense components of the split bands are underlined.

<sup>a</sup> Theoretically predicted wavenumbers were scaled by 0.98 for wavenumbers lower than 2000 cm<sup>-1</sup>, or by 0.95 for wavenumbers higher than 2000 cm<sup>-1</sup>.

<sup>b</sup> Abbreviations:  $\nu$  stretching;  $\beta$  bending in-plane;  $\gamma$  bending out-of-plane.
